# Supplementary material for: Privileged substructures for anti-sickling activity via cheminformatic analysis
Source: PubMed Central journal article supplement (PMC9078244; doi:10.1039/c7ra12079f), 2018-02-07
Supplement: RA-008-C7RA12079F-s001.pdf [file RA-008-C7RA12079F-s001.pdf]

## Ethacrynic acid

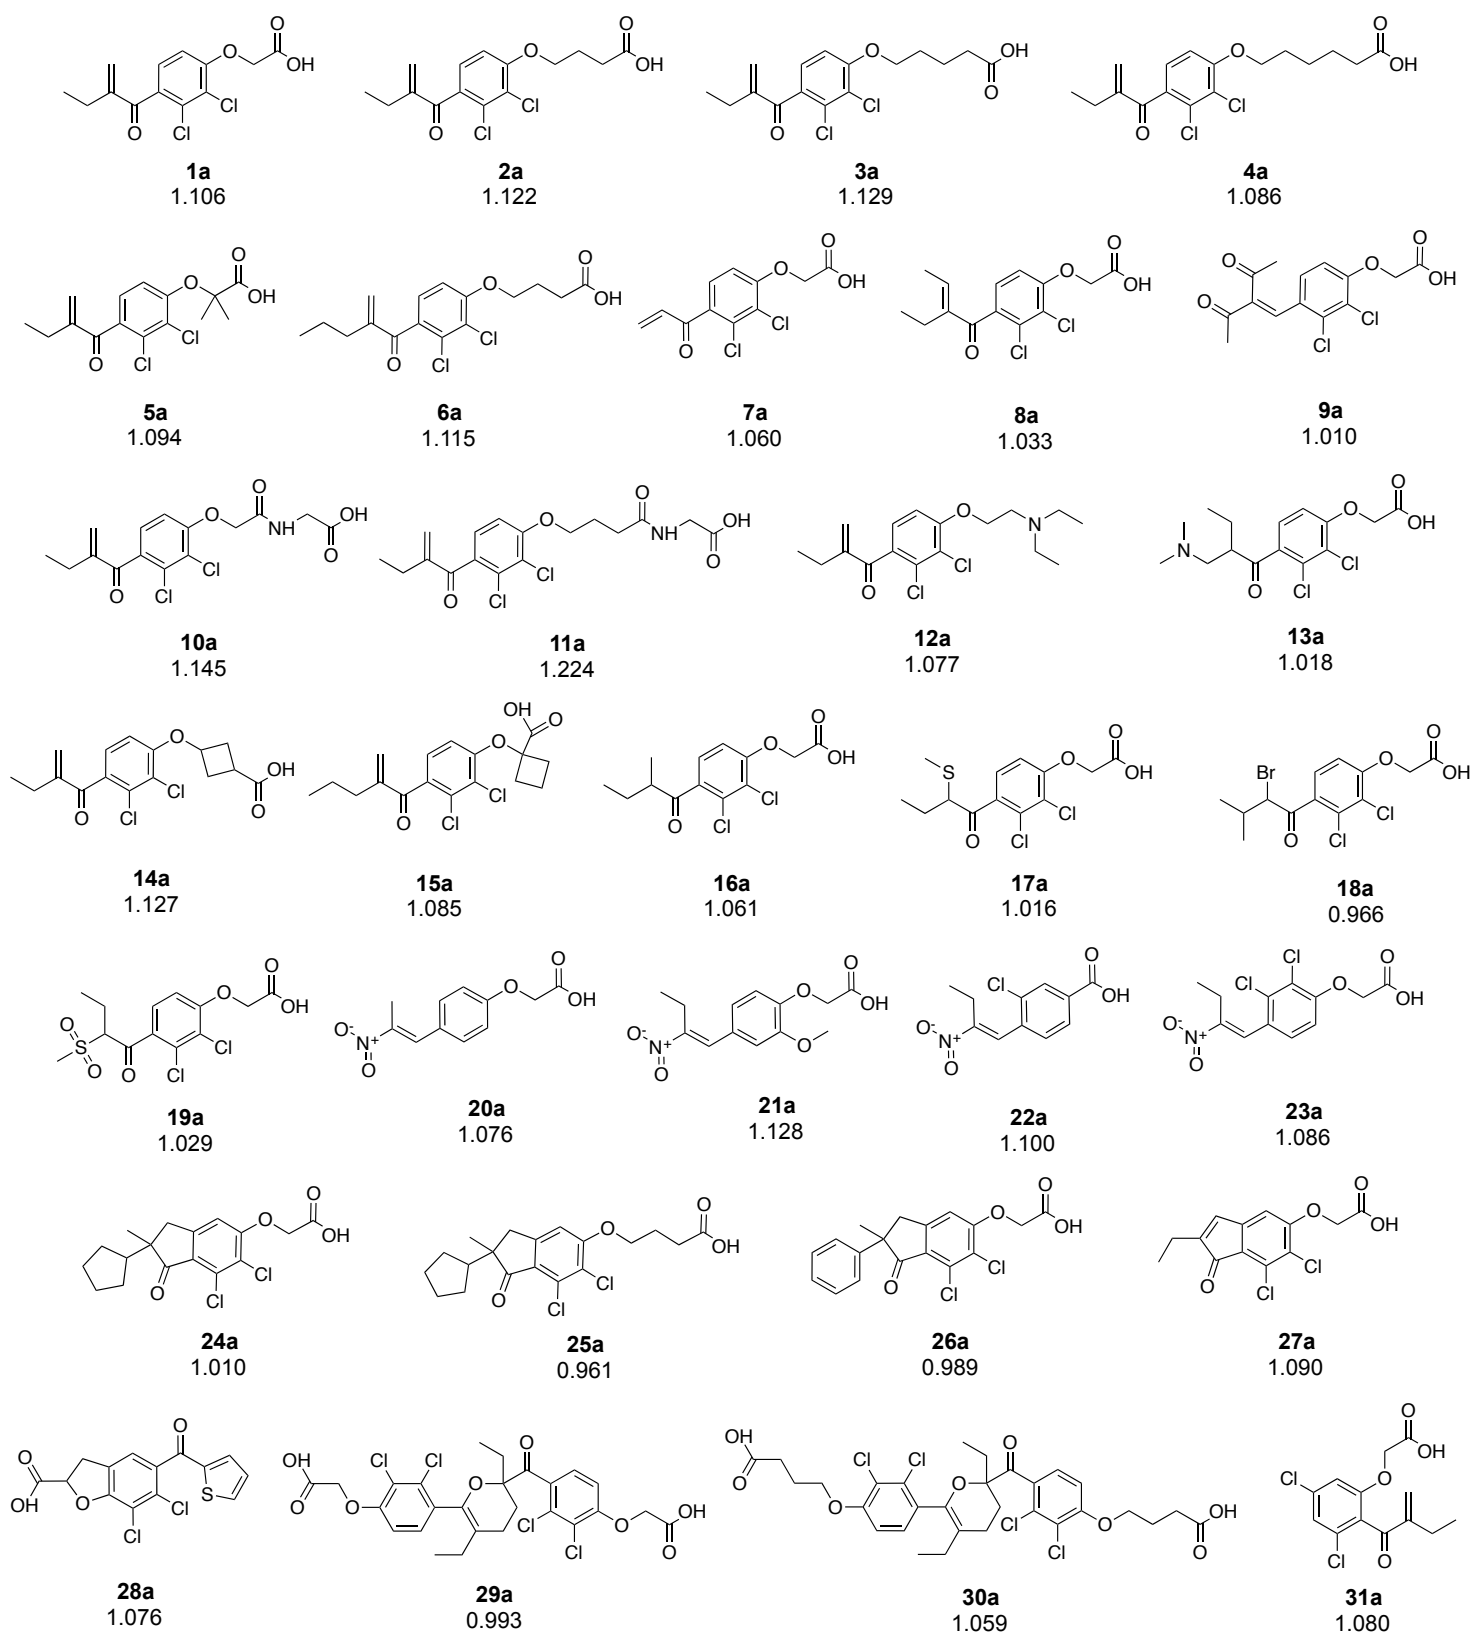

**Supplementary Fig. 1.** Chemical structures of ethacrynic acid analogs and their anti-sickling activity (HbS ratio ranging from 0.961-1.224).

## Benzyloxyacetic acid

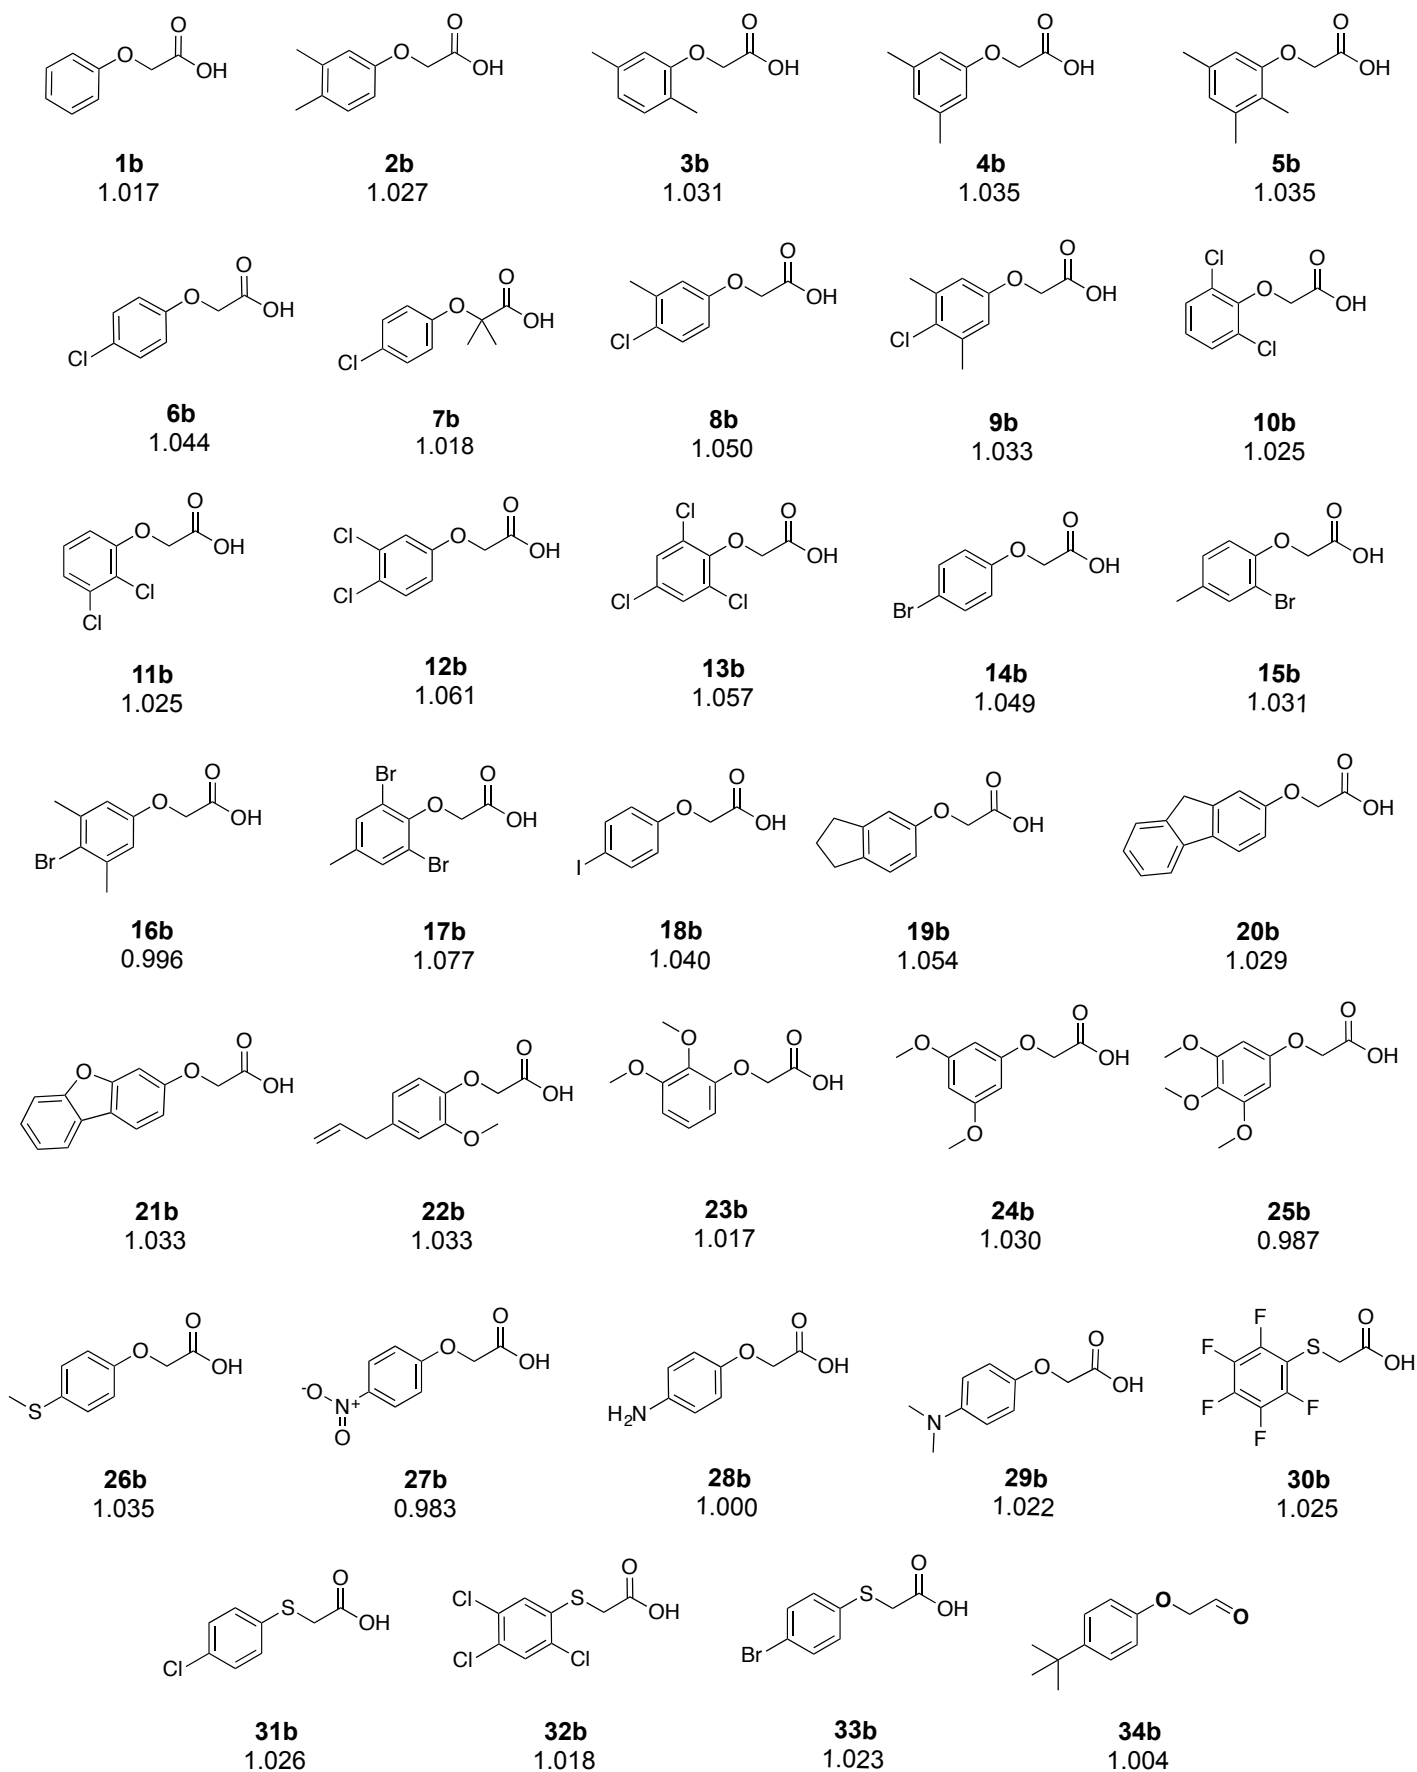

**Supplementary Fig. 2.** Chemical structures of benzyloxyacetic acid analogs and their anti-sickling activity (HbS ratio ranging from 0.983-1.077).

## Phenoxyacetic acid

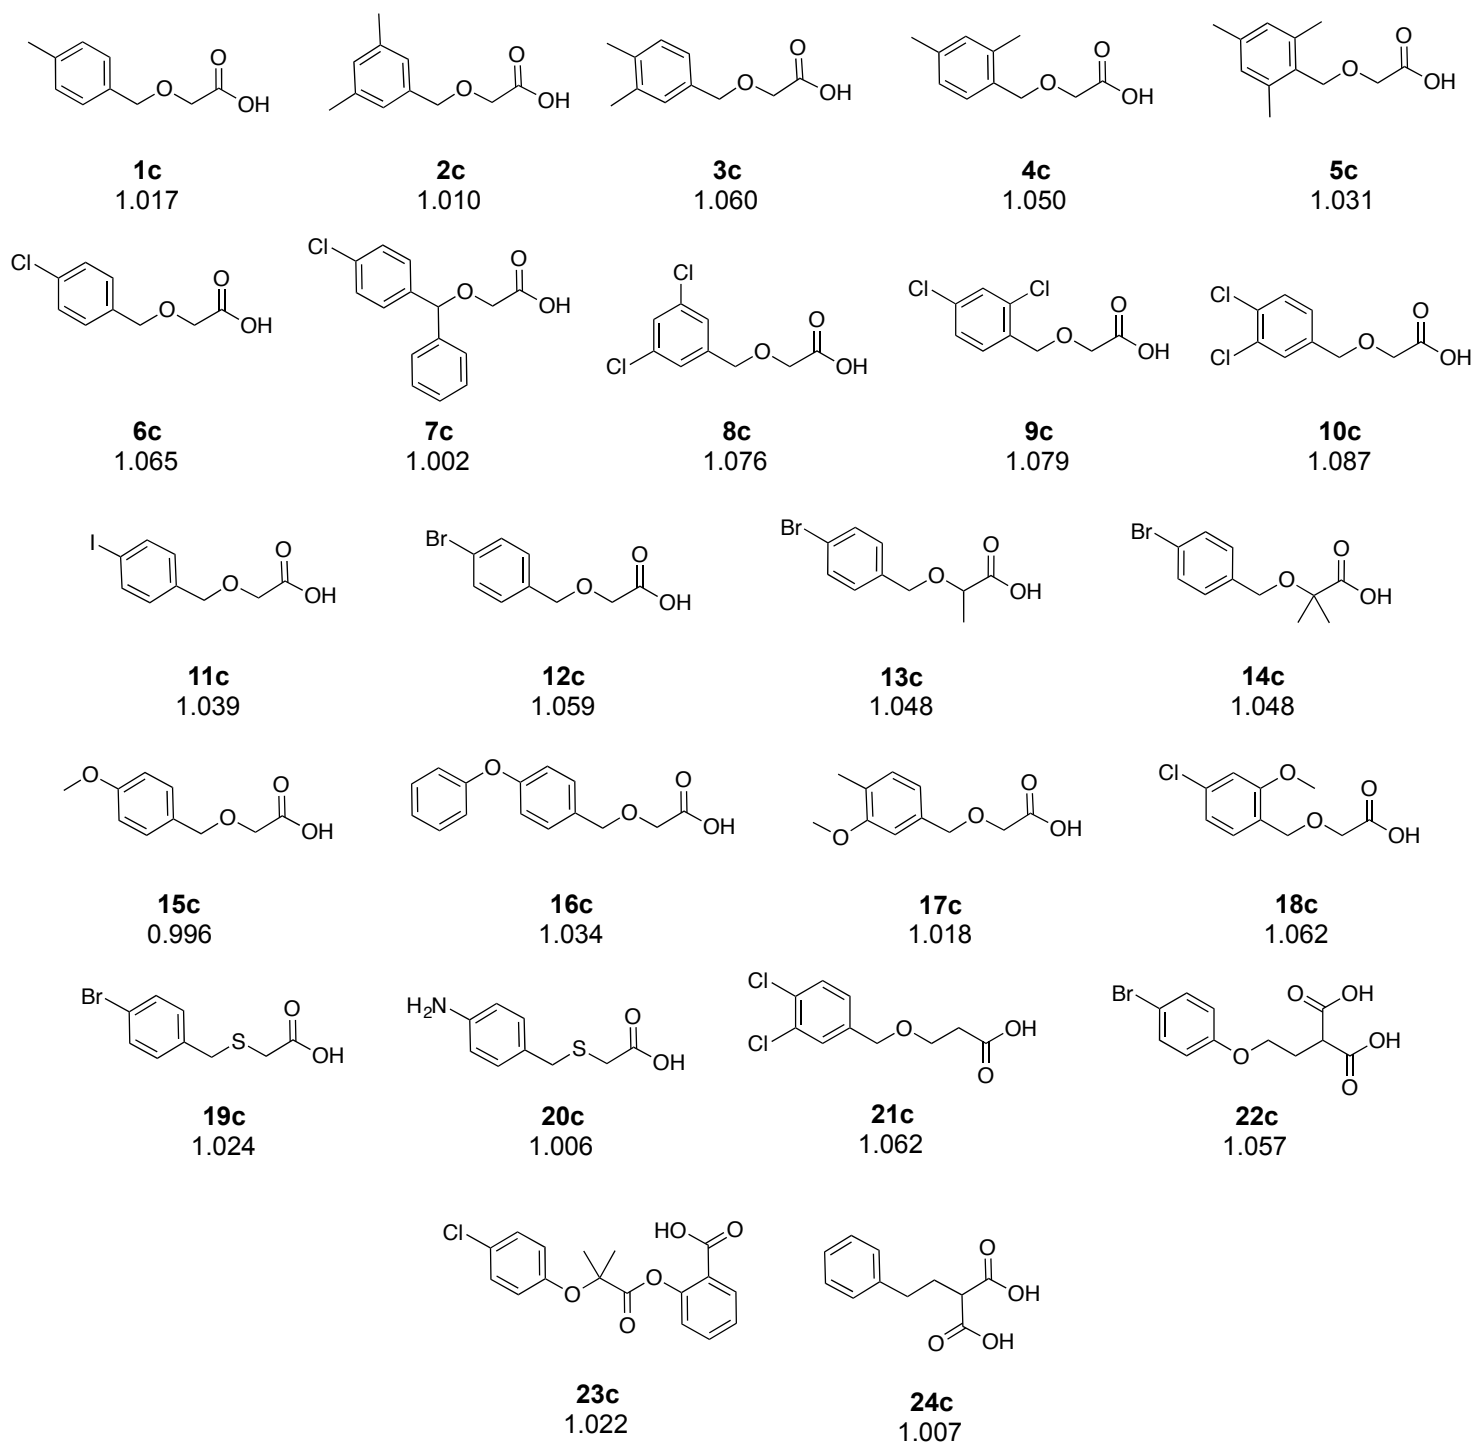

**Supplementary Fig. 3.** Chemical structures of phenoxyacetic acid analogs and their anti-sickling activity (HbS ratio ranging from 0.996 to 1.087).

## Aromatic amide

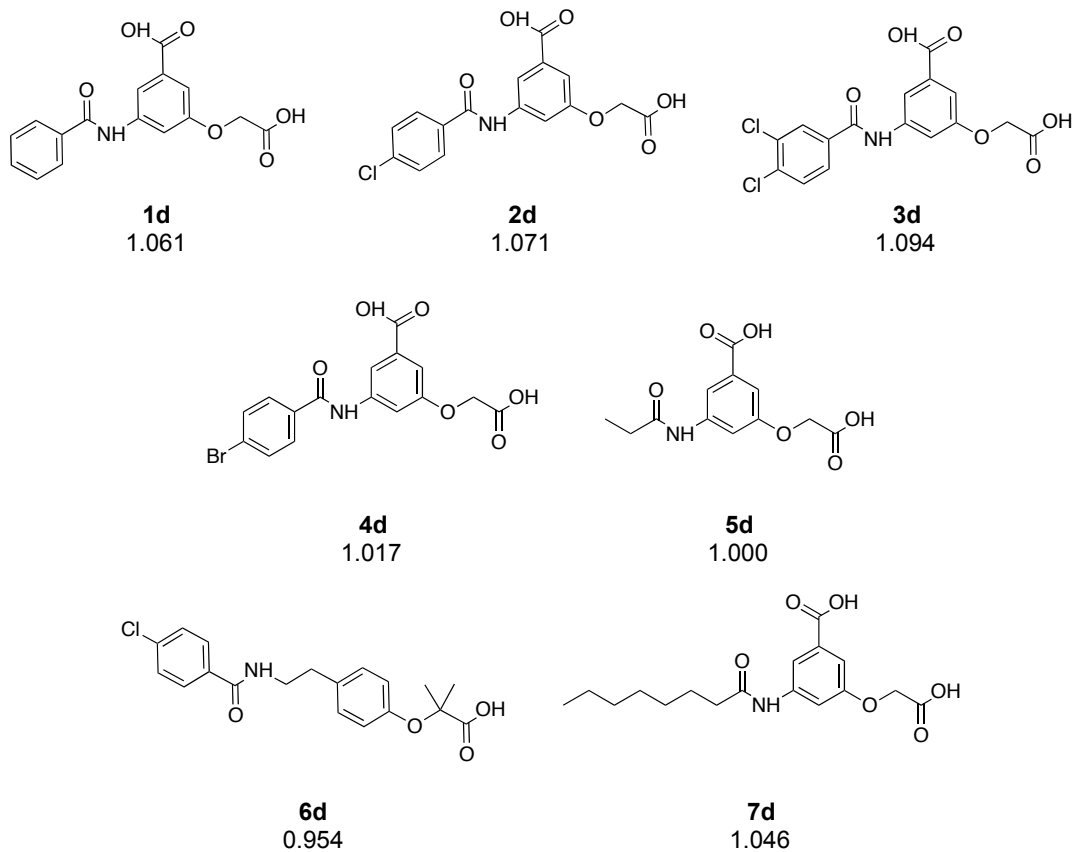

**Supplementary Fig. 4.** Chemical structures of aromatic amide analogs and their anti-sickling activity (HbS ratio ranging from 0.954 to 1.094).

## Proline

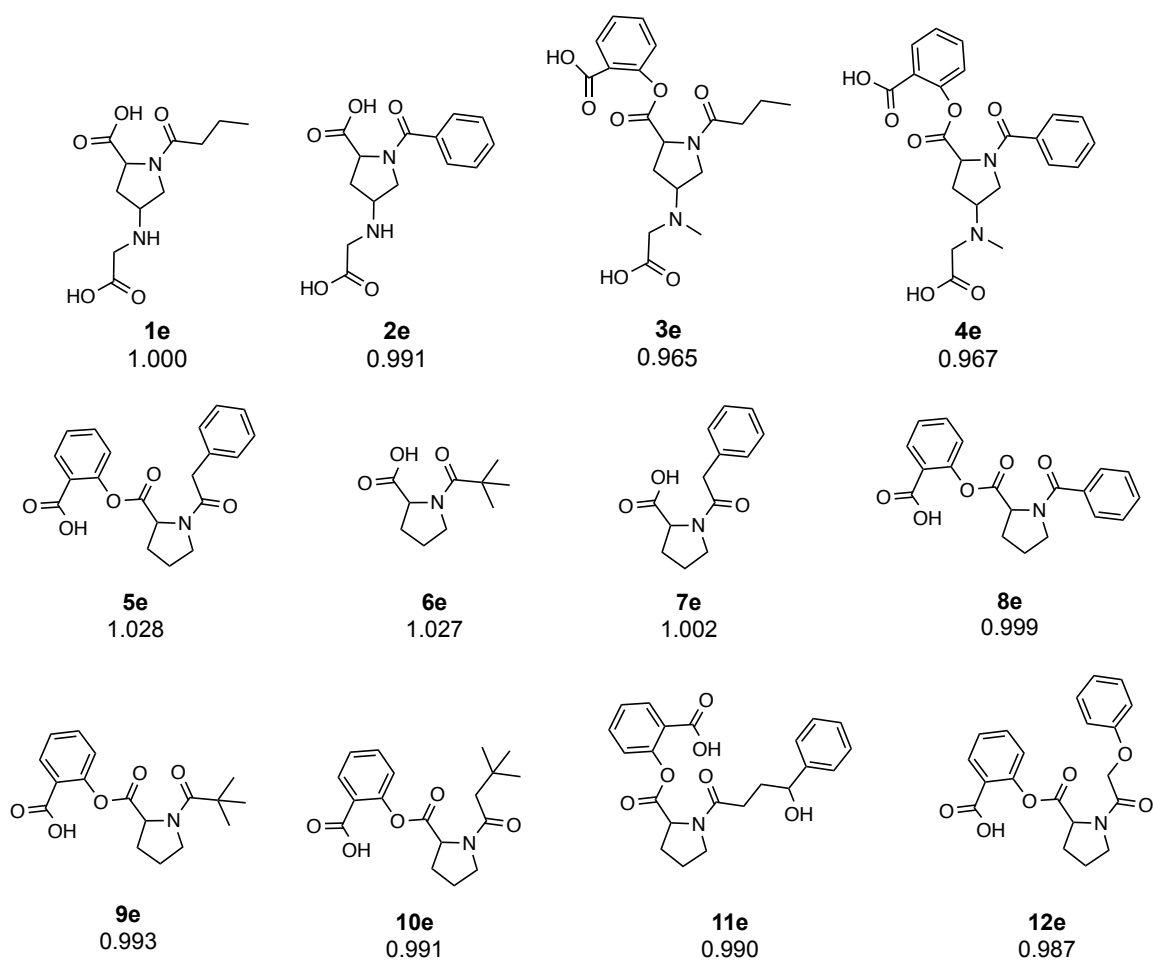

**Supplementary Fig. 5.** Chemical structures of proline analogs and their anti-sickling activity (HbS ratio ranging from 0.967 to 1.028).

## 2,2 - dimethylchroman

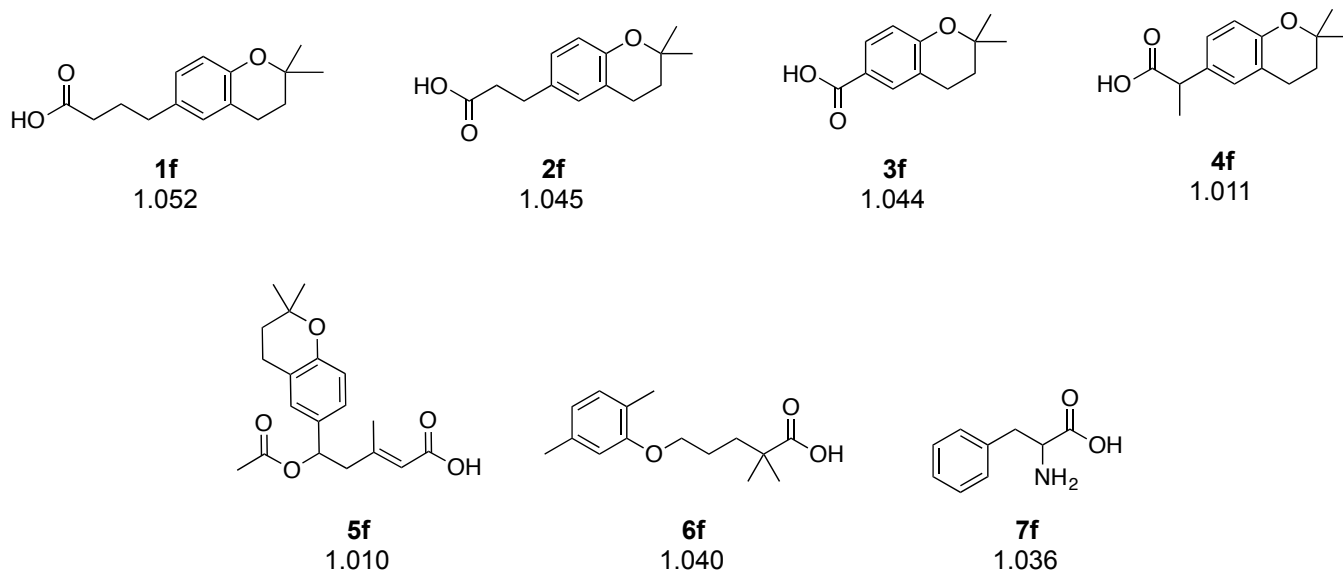

**Supplementary Fig. 6.** Chemical structures of 2,2-dimethylchroman analogs and their anti-sickling activity (HbS ratio ranging from 1.010 to 1.052).
